# Supplementary material for: The effect of compliance with a perioperative goal-directed therapy protocol on outcomes after high-risk surgery: a before-after study
Source: Springer Nature journal article supplement (doi:10.1007/s10877-020-00585-w), 2020-09-12
Supplement: MOESM1 [file 18372880]

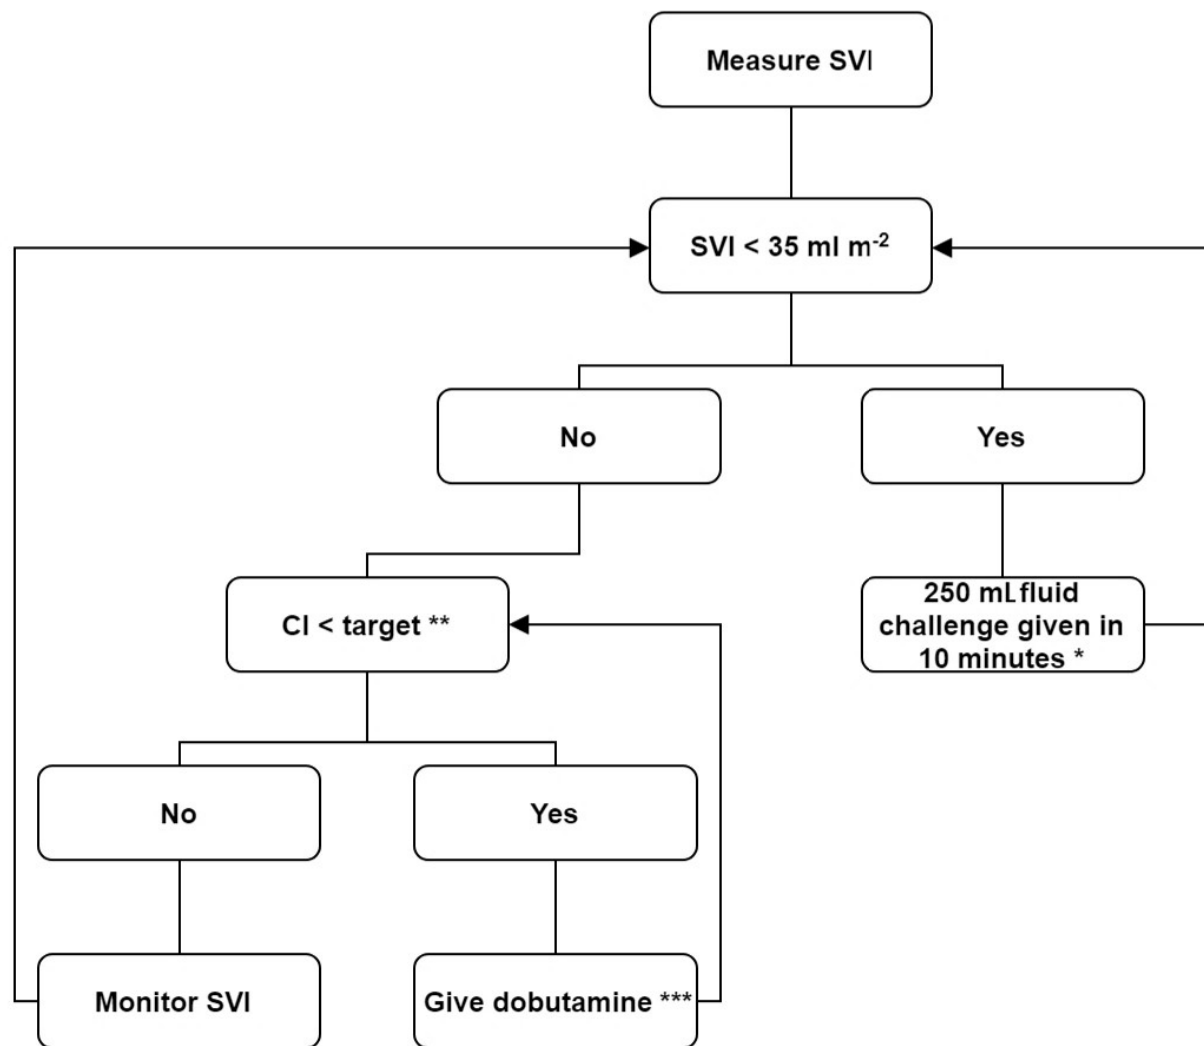

**pGDT protocol 2**

- \* Fluid challenge: colloids (max. 4 units) or crystalloids (e.g. ringer's lactate)  
Alternative option: transfuse 1 unit of red blood cells (only when combined with low Hb levels)
- \*\* CI target is age-dependent
  - < 60 years:  $2.8 \text{ L min}^{-1} \text{ m}^{-2}$
  - 60 – 75 years:  $2.6 \text{ L min}^{-1} \text{ m}^{-2}$
  - >75 years:  $2.4 \text{ L min}^{-1} \text{ m}^{-2}$
- \*\*\* Starting dosage:  $2.5 \mu\text{g kg}^{-1} \text{ min}^{-1}$   
Alternative option: noradrenaline (syringes of 5mg/50mL or 10mg/50mL), starting dosage  $0.02 - 0.04 \mu\text{g kg}^{-1} \text{ min}^{-1}$   
When a central venous catheter is absent, consider:  
Ephedrine / phenylephrine  
Noradrenaline (1mg/50mL)

**Other hemodynamic targets**

- Standard fluid intake:  $2 \text{ mL kg}^{-1} \text{ h}^{-1}$  crystalloids
- Hb targets according to hospital guidelines for adults
- Heart frequency < 100 beats/minute
